# Supplementary material for: Association Between Social Participation and Instrumental Activities of Daily Living Among Community-Dwelling Older Adults
Source: PubMed Central journal article supplement (PMC5037253; doi:10.2188/jea.je20150253), 2016-10-05
Supplement: je-26-553-s001.pdf [file je-26-553-s001.pdf]

**eTable 1.** Tokyo Metropolitan Institute of Gerontology Index of Competence for assessing higher-level functional capacity in older adults

| Sub-scales                                                            | Response |       |
|-----------------------------------------------------------------------|----------|-------|
| <b>Instrumental Activities of Daily Living</b>                        |          |       |
| 1 Can you use public transportation (bus or train) by yourself?       | 1. Yes   | 0. No |
| 2 Are you able to shop for daily necessities?                         | 1. Yes   | 0. No |
| 3 Are you able to prepare meals by yourself?                          | 1. Yes   | 0. No |
| 4 Are you able to pay bills?                                          | 1. Yes   | 0. No |
| 5 Can you handle your own banking?                                    | 1. Yes   | 0. No |
| <b>Intellectual Activity</b>                                          |          |       |
| 6 Are you able to fill out forms for your pension?                    | 1. Yes   | 0. No |
| 7 Do you read newspapers?                                             | 1. Yes   | 0. No |
| 8 Do you read books or magazines?                                     | 1. Yes   | 0. No |
| 9 Are you interested in news stories or programs dealing with health? | 1. Yes   | 0. No |
| <b>Social Role</b>                                                    |          |       |
| 10 Do you visit the homes of friends?                                 | 1. Yes   | 0. No |
| 11 Are you sometimes called on for advice?                            | 1. Yes   | 0. No |
| 12 Are you able to visit sick friends?                                | 1. Yes   | 0. No |
| 13 Do you sometimes initiate conversations with young people?         | 1. Yes   | 0. No |
