# Supplementary material for: Association Between Social Participation and Instrumental Activities of Daily Living Among Community-Dwelling Older Adults
Source: PubMed Central journal article supplement (PMC5037253; doi:10.2188/jea.je20150253), 2016-10-05
Supplement: je-26-553-s002.pdf [file je-26-553-s002.pdf]

**eTable 2.** Distribution of the number of social groups and the type and frequency of social participation (n=14,956)

|                                                   | Males (n=6,935) |      | Females (n=8,021) |      | <i>P</i> <sup>a</sup> |
|---------------------------------------------------|-----------------|------|-------------------|------|-----------------------|
|                                                   | n               | %    | n                 | %    |                       |
| <b>Number of social groups</b>                    |                 |      |                   |      |                       |
| 0                                                 | 2,185           | 31.5 | 2,663             | 33.2 | 0.072                 |
| 1                                                 | 1,522           | 21.9 | 1,710             | 21.3 |                       |
| 2                                                 | 1,251           | 18.0 | 1,352             | 16.9 |                       |
| ≥3                                                | 1,977           | 28.5 | 2,296             | 28.6 |                       |
| <b>Type and frequency of social participation</b> |                 |      |                   |      |                       |
| Volunteer groups                                  |                 |      |                   |      |                       |
| Non-participation                                 | 5,366           | 77.4 | 6,519             | 81.3 | <0.001                |
| Several times a year                              | 553             | 8.0  | 425               | 5.3  |                       |
| Several times a month                             | 493             | 7.1  | 562               | 7.0  |                       |
| Once a week                                       | 203             | 2.9  | 215               | 2.7  |                       |
| Several times a week                              | 210             | 3.0  | 228               | 2.8  |                       |
| Four or more times a week                         | 110             | 1.6  | 72                | 0.9  |                       |
| Sports groups                                     |                 |      |                   |      |                       |
| Non-participation                                 | 4,596           | 66.3 | 5,761             | 71.8 | <0.001                |
| Several times a year                              | 490             | 7.1  | 165               | 2.1  |                       |
| Several times a month                             | 618             | 8.9  | 354               | 4.4  |                       |
| Once a week                                       | 330             | 4.8  | 666               | 8.3  |                       |
| Several times a week                              | 602             | 8.7  | 756               | 9.4  |                       |
| Four or more times a week                         | 299             | 4.3  | 319               | 4.0  |                       |
| Hobby groups                                      |                 |      |                   |      |                       |
| Non-participation                                 | 4,039           | 58.2 | 4,533             | 56.5 | <0.001                |
| Several times a year                              | 754             | 10.9 | 432               | 5.4  |                       |
| Several times a month                             | 1,049           | 15.1 | 1,468             | 18.3 |                       |
| Once a week                                       | 477             | 6.9  | 726               | 9.1  |                       |
| Several times a week                              | 425             | 6.1  | 661               | 8.2  |                       |
| Four or more times a week                         | 191             | 2.8  | 201               | 2.5  |                       |
| Senior citizens' clubs                            |                 |      |                   |      |                       |
| Non-participation                                 | 5,937           | 85.6 | 6,666             | 83.1 | <0.001                |
| Several times a year                              | 407             | 5.9  | 473               | 5.9  |                       |
| Several times a month                             | 367             | 5.3  | 609               | 7.6  |                       |
| Once a week                                       | 73              | 1.1  | 99                | 1.2  |                       |
| Several times a week                              | 122             | 1.8  | 135               | 1.7  |                       |
| Four or more times a week                         | 29              | 0.4  | 39                | 0.5  |                       |
| Neighborhood community associations               |                 |      |                   |      |                       |
| Non-participation                                 | 4,022           | 58.0 | 5,078             | 63.3 | <0.001                |
| Several times a year                              | 2,127           | 30.7 | 2,337             | 29.1 |                       |
| Several times a month                             | 558             | 8.0  | 469               | 5.8  |                       |
| Once a week                                       | 93              | 1.3  | 64                | 0.8  |                       |
| Several times a week                              | 83              | 1.2  | 53                | 0.7  |                       |
| Four or more times a week                         | 52              | 0.7  | 20                | 0.2  |                       |
| Cultural groups                                   |                 |      |                   |      |                       |
| Non-participation                                 | 5,865           | 84.6 | 6,298             | 78.5 | <0.001                |
| Several times a year                              | 493             | 7.1  | 554               | 6.9  |                       |
| Several times a month                             | 370             | 5.3  | 666               | 8.3  |                       |
| Once a week                                       | 127             | 1.8  | 283               | 3.5  |                       |
| Several times a week                              | 55              | 0.8  | 173               | 2.2  |                       |
| Four or more times a week                         | 25              | 0.4  | 47                | 0.6  |                       |

<sup>a</sup> Differences between males and females were analyzed using Fisher's exact test.
