# Supplementary material for: Association Between Social Participation and Instrumental Activities of Daily Living Among Community-Dwelling Older Adults
Source: PubMed Central journal article supplement (PMC5037253; doi:10.2188/jea.je20150253), 2016-10-05
Supplement: je-26-553-s003.pdf [file je-26-553-s003.pdf]

**eTable 3.** Characteristics of the analyzed subjects responding to the questionnaire (n=14,956)

|                                             | Males (n=6,935) |      | Females (n=8,021) |      | <i>P</i> <sup>a</sup> |
|---------------------------------------------|-----------------|------|-------------------|------|-----------------------|
|                                             | n               | %    | n                 | %    |                       |
| <b>Demographics</b>                         |                 |      |                   |      |                       |
| Age, years                                  |                 |      |                   |      |                       |
| 65-74                                       | 4,302           | 62.0 | 4,696             | 58.5 | <0.001                |
| ≥75                                         | 2,633           | 38.0 | 3,325             | 41.5 |                       |
| Family structure                            |                 |      |                   |      |                       |
| Living alone                                | 492             | 7.1  | 1,422             | 17.7 | <0.001                |
| Living only with spouse                     | 3,503           | 50.5 | 2,787             | 34.7 |                       |
| Other                                       | 2,728           | 39.3 | 3,480             | 43.4 |                       |
| Missing                                     | 212             | 3.1  | 332               | 4.1  |                       |
| BMI                                         |                 |      |                   |      |                       |
| Normal (18.5-<25.0 kg/m <sup>2</sup> )      | 4,919           | 70.9 | 5,390             | 67.2 | <0.001                |
| Underweight (<18.5 kg/m <sup>2</sup> )      | 355             | 5.1  | 895               | 11.2 |                       |
| Overweight (≥25.0 kg/m <sup>2</sup> )       | 1,385           | 20.0 | 1,366             | 17.0 |                       |
| Missing                                     | 276             | 4.0  | 370               | 4.6  |                       |
| Pensions                                    |                 |      |                   |      |                       |
| National pension                            | 781             | 11.3 | 3,613             | 45.0 | <0.001                |
| Employees' pension                          | 4,748           | 68.5 | 2,934             | 36.6 |                       |
| Mutual aid association pension              | 908             | 13.1 | 648               | 8.1  |                       |
| Other                                       | 218             | 3.1  | 488               | 6.1  |                       |
| Missing                                     | 280             | 4.0  | 338               | 4.2  |                       |
| Occupational status (job with an income)    |                 |      |                   |      |                       |
| Not engaged                                 | 4,904           | 70.7 | 6,715             | 83.7 | <0.001                |
| Engaged                                     | 1,898           | 27.4 | 1,041             | 13.0 |                       |
| Missing                                     | 133             | 1.9  | 265               | 3.3  |                       |
| <b>Health status</b>                        |                 |      |                   |      |                       |
| Number of medications used                  |                 |      |                   |      |                       |
| None                                        | 1,425           | 20.5 | 1,650             | 20.6 | 0.240                 |
| 1-2                                         | 1,846           | 26.6 | 2,197             | 27.4 |                       |
| 3-4                                         | 1,641           | 23.7 | 1,952             | 24.3 |                       |
| ≥5                                          | 1,769           | 25.5 | 1,966             | 24.5 |                       |
| Missing                                     | 254             | 3.7  | 256               | 3.2  |                       |
| Number of illnesses under medical treatment |                 |      |                   |      |                       |
| None                                        | 1,276           | 18.4 | 1,449             | 18.1 | 0.011                 |
| 1                                           | 2,244           | 32.4 | 2,679             | 33.4 |                       |
| 2                                           | 1,617           | 23.3 | 1,900             | 23.7 |                       |
| 3                                           | 947             | 13.7 | 957               | 11.9 |                       |
| ≥4                                          | 682             | 9.8  | 792               | 9.9  |                       |
| Missing                                     | 169             | 2.4  | 244               | 3.0  |                       |
| Self-rated health                           |                 |      |                   |      |                       |
| Very good                                   | 713             | 10.3 | 734               | 9.2  | 0.006                 |
| Good                                        | 4,453           | 64.2 | 5,245             | 65.4 |                       |
| Fair                                        | 993             | 14.3 | 1,208             | 15.1 |                       |
| Poor                                        | 372             | 5.4  | 449               | 5.6  |                       |
| Missing                                     | 404             | 5.8  | 385               | 4.8  |                       |
| <b>Life-style habits</b>                    |                 |      |                   |      |                       |
| Smoking status                              |                 |      |                   |      |                       |
| Never                                       | 1,701           | 24.5 | 7,013             | 87.4 | <0.001                |
| Former                                      | 3,809           | 54.9 | 420               | 5.2  |                       |

|                                                                                           |       |      |       |      |        |
|-------------------------------------------------------------------------------------------|-------|------|-------|------|--------|
| Current                                                                                   | 1,137 | 16.4 | 260   | 3.2  | <0.001 |
| Missing                                                                                   | 288   | 4.2  | 328   | 4.1  |        |
| <b>Alcohol intake</b>                                                                     |       |      |       |      |        |
| Nondrinkers                                                                               | 1,189 | 17.1 | 4,136 | 51.6 |        |
| Social drinkers                                                                           | 1,497 | 21.6 | 2,070 | 25.8 |        |
| Occasional drinkers                                                                       | 1,103 | 15.9 | 1,032 | 12.9 | <0.001 |
| Daily drinkers                                                                            | 2,856 | 41.2 | 500   | 6.2  |        |
| Missing                                                                                   | 290   | 4.2  | 283   | 3.5  |        |
| <b>Physiological factor</b>                                                               |       |      |       |      |        |
| Activities of daily living, Barthel-index                                                 |       |      |       |      |        |
| Independent (score =100)                                                                  | 1,568 | 22.6 | 2,620 | 32.7 | <0.001 |
| Poor (score <100)                                                                         | 5,367 | 77.4 | 5,401 | 67.3 |        |
| <b>Psychological factors</b>                                                              |       |      |       |      |        |
| Depression, Geriatric Depression Scale                                                    |       |      |       |      |        |
| No depression (score <2)                                                                  | 4,964 | 71.6 | 5,433 | 67.7 |        |
| Depression (score ≥2)                                                                     | 1,641 | 23.7 | 2,272 | 28.3 | <0.001 |
| Missing                                                                                   | 330   | 4.8  | 316   | 3.9  |        |
| Cognitive functioning, Cognitive Performance Scale                                        |       |      |       |      |        |
| Normal (score =0)                                                                         | 5,327 | 76.8 | 6,347 | 79.1 |        |
| Poor (score ≥1)                                                                           | 1,510 | 21.8 | 1,588 | 19.8 | 0.002  |
| Missing                                                                                   | 98    | 1.4  | 86    | 1.1  |        |
| <b>Social relationships</b>                                                               |       |      |       |      |        |
| Social networks                                                                           |       |      |       |      |        |
| ≥6                                                                                        | 2,492 | 35.9 | 3,028 | 37.8 |        |
| 3-5                                                                                       | 1,425 | 20.5 | 1,918 | 23.9 |        |
| 1-2                                                                                       | 1,456 | 21.0 | 1,664 | 20.7 | <0.001 |
| None                                                                                      | 1,202 | 17.3 | 989   | 12.3 |        |
| Missing                                                                                   | 360   | 5.2  | 422   | 5.3  |        |
| Social support                                                                            |       |      |       |      |        |
| ≥5                                                                                        | 738   | 10.6 | 1,088 | 13.6 |        |
| 3-4                                                                                       | 2,122 | 30.6 | 2,675 | 33.3 |        |
| 1-2                                                                                       | 3,592 | 51.8 | 3,612 | 45.0 | <0.001 |
| None                                                                                      | 220   | 3.2  | 354   | 4.4  |        |
| Missing                                                                                   | 263   | 3.8  | 292   | 3.6  |        |
| Social roles, subscale of Tokyo Metropolitan Institute of Gerontology Index of Competence |       |      |       |      |        |
| Independent (score =4)                                                                    | 3,100 | 44.7 | 4,465 | 55.7 | <0.001 |
| Poor (score <4)                                                                           | 3,835 | 55.3 | 3,556 | 44.3 |        |

<sup>a</sup> Differences between males and females were analyzed using Fisher's exact test
