# Supplementary material for: Association Between Social Participation and Instrumental Activities of Daily Living Among Community-Dwelling Older Adults
Source: PubMed Central journal article supplement (PMC5037253; doi:10.2188/jea.je20150253), 2016-10-05
Supplement: je-26-553-s004.pdf [file je-26-553-s004.pdf]

**eTable 4.** Odds ratios for poor instrumental activities of daily living among subjects with perfect covariates (n=12,472)

|                                            | Males (n=5,883) |                   | Females (n=6,589) |                                |
|--------------------------------------------|-----------------|-------------------|-------------------|--------------------------------|
|                                            | OR <sup>a</sup> | (95% CI)          | OR <sup>a</sup>   | (95% CI)                       |
| <b>Number of social groups</b>             |                 |                   |                   |                                |
| 0                                          | 1.00            |                   | 1.00              |                                |
| 1                                          | 0.76            | ( 0.63 - 0.93 ) * | 0.58              | ( 0.43 - 0.78 ) *              |
| 2                                          | 0.73            | ( 0.58 - 0.92 ) * | 0.40              | ( 0.26 - 0.59 ) *              |
| ≥3                                         | 0.68            | ( 0.55 - 0.85 ) * | 0.17              | ( 0.10 - 0.28 ) *              |
| p for trend                                |                 | p=0.001           |                   | p<0.001                        |
| <b>Volunteer groups</b>                    |                 |                   |                   |                                |
| Several times a year                       | 0.81            | ( 0.60 - 1.11 )   | 0.77              | ( 0.35 - 1.67 )                |
| Several times a month                      | 0.99            | ( 0.73 - 1.35 )   | 0.79              | ( 0.37 - 1.67 )                |
| Once or more a week                        | 0.97            | ( 0.71 - 1.32 )   | 0.54              | ( 0.26 - 1.13 )                |
| <b>Sports groups</b>                       |                 |                   |                   |                                |
| Several times a year                       | 0.64            | ( 0.46 - 0.90 ) * | 0.67              | ( 0.19 - 2.41 )                |
| Several times a month                      | 0.71            | ( 0.52 - 0.97 ) * | 0.19              | ( 0.06 - 0.68 ) *              |
| Once or more a week                        | 0.79            | ( 0.64 - 0.99 ) * | 0.23              | ( 0.12 - 0.41 ) *              |
| <b>Hobby groups</b>                        |                 |                   |                   |                                |
| Several times a year                       | 0.84            | ( 0.65 - 1.09 )   | 0.58              | ( 0.29 - 1.14 )                |
| Several times a month                      | 0.78            | ( 0.61 - 0.99 ) * | 0.37              | ( 0.24 - 0.58 ) *              |
| Once or more a week                        | 0.92            | ( 0.73 - 1.16 )   | 0.34              | ( 0.20 - 0.57 ) *              |
| <b>Senior citizens' clubs</b>              |                 |                   |                   |                                |
| Several times a year                       | 0.90            | ( 0.65 - 1.24 )   | 0.78              | ( 0.49 - 1.23 )                |
| Several times a month                      | 0.96            | ( 0.68 - 1.37 )   | 0.57              | ( 0.36 - 0.91 ) *              |
| Once or more a week                        | 0.64            | ( 0.38 - 1.07 ) † | 0.33              | ( 0.13 - 0.81 ) *              |
| <b>Neighborhood community associations</b> |                 |                   |                   |                                |
| Several times a year                       | 0.78            | ( 0.65 - 0.92 ) * | 0.50              | ( 0.35 - 0.71 ) *              |
| Several times a month                      | 0.73            | ( 0.54 - 1.00 ) * | 0.15              | ( 0.06 - 0.40 ) * <sup>b</sup> |
| Once or more a week                        | 1.43            | ( 0.92 - 2.22 )   |                   |                                |
| <b>Cultural groups</b>                     |                 |                   |                   |                                |
| Several times a year                       | 0.89            | ( 0.65 - 1.23 )   | 0.29              | ( 0.12 - 0.73 ) *              |
| Several times a month                      | 1.00            | ( 0.69 - 1.45 )   | 0.20              | ( 0.09 - 0.48 ) *              |
| Once or more a week                        | 1.00            | ( 0.62 - 1.62 )   | 0.52              | ( 0.21 - 1.31 )                |

CI, confidence interval; OR, odds ratio.

† p<0.10

\* p<0.05

<sup>a</sup>Adjusted for age, family structure, BMI, pensions, occupational status, the number of medications used, self-reported medical conditions, self-rated health, smoking, alcohol consumption, activities of daily living, depression, cognitive function, social network, social support, and social role
