# Supplementary material for: Association Between Social Participation and Instrumental Activities of Daily Living Among Community-Dwelling Older Adults
Source: PubMed Central journal article supplement (PMC5037253; doi:10.2188/jea.je20150253), 2016-10-05
Supplement: je-26-553-s005.pdf [file je-26-553-s005.pdf]

**eTable 5.** Odds ratios for poor instrumental activities of daily living: gender and social participation interactions (n=14,956)

|                                                      | OR <sup>a</sup> | (95% CI)          |
|------------------------------------------------------|-----------------|-------------------|
| <b>Number of social groups</b>                       |                 |                   |
| 1 (reference: zero)                                  | 0.51            | ( 0.41 - 0.63 ) * |
| 2 (reference: zero)                                  | 0.32            | ( 0.23 - 0.43 ) * |
| ≥3 (reference: zero)                                 | 0.10            | ( 0.07 - 0.16 ) * |
| Male (reference: female)                             | 1.65            | ( 1.37 - 2.00 ) * |
| Participation number × gender                        | p<0.001         |                   |
| <b>Volunteer groups</b>                              |                 |                   |
| Several times a year (reference: non-participation)  | 0.59            | ( 0.34 - 1.00 ) * |
| Several times a month (reference: non-participation) | 0.49            | ( 0.29 - 0.84 ) * |
| Once or more a week (reference: non-participation)   | 0.41            | ( 0.24 - 0.70 ) * |
| Male (reference: female)                             | 2.32            | ( 1.97 - 2.73 ) * |
| Participation frequency × gender                     | p=0.002         |                   |
| <b>Sports groups</b>                                 |                 |                   |
| Several times a year (reference: non-participation)  | 0.28            | ( 0.08 - 0.90 ) * |
| Several times a month (reference: non-participation) | 0.10            | ( 0.03 - 0.31 ) * |
| Once or more a week (reference: non-participation)   | 0.16            | ( 0.10 - 0.25 ) * |
| Male (reference: female)                             | 2.09            | ( 1.77 - 2.46 ) * |
| Participation frequency × gender                     | p<0.001         |                   |
| <b>Hobby groups</b>                                  |                 |                   |
| Several times a year (reference: non-participation)  | 0.44            | ( 0.27 - 0.71 ) * |
| Several times a month (reference: non-participation) | 0.27            | ( 0.19 - 0.39 ) * |
| Once or more a week (reference: non-participation)   | 0.19            | ( 0.13 - 0.29 ) * |
| Male (reference: female)                             | 1.92            | ( 1.62 - 2.28 ) * |
| Participation frequency × gender                     | p<0.001         |                   |
| <b>Senior citizens' clubs</b>                        |                 |                   |
| Several times a year (reference: non-participation)  | 0.80            | ( 0.56 - 1.12 )   |
| Several times a month (reference: non-participation) | 0.59            | ( 0.41 - 0.82 ) * |
| Once or more a week (reference: non-participation)   | 0.35            | ( 0.19 - 0.66 ) * |
| Male (reference: female)                             | 2.41            | ( 2.04 - 2.84 ) * |
| Participation frequency × gender                     | p=0.474         |                   |
| <b>Neighborhood community associations</b>           |                 |                   |
| Several times a year (reference: non-participation)  | 0.31            | ( 0.23 - 0.41 ) * |
| Once or more a month (reference: non-participation)  | 0.14            | ( 0.07 - 0.28 ) * |
| Male (reference: female)                             | 2.00            | ( 1.69 - 2.37 ) * |
| Participation frequency × gender                     | p<0.001         |                   |
| <b>Cultural groups</b>                               |                 |                   |
| Several times a year (reference: non-participation)  | 0.27            | ( 0.14 - 0.53 ) * |
| Several times a month (reference: non-participation) | 0.24            | ( 0.13 - 0.43 ) * |
| Once or more a week (reference: non-participation)   | 0.21            | ( 0.09 - 0.48 ) * |
| Male (reference: female)                             | 2.20            | ( 1.87 - 2.59 ) * |
| Participation frequency × gender                     | p<0.001         |                   |

CI, confidence interval; OR, odds ratio.

\*  $p < 0.05$

<sup>a</sup>Adjusted for age, family structure, BMI, pensions, occupational status, the number of medications used, self-reported medical conditions, self-rated health, smoking, alcohol consumption, activities of daily living, depression, cognitive function, social network, social support, and social role
